# Supplementary material for: Verification of the Atmospheric Infrared Sounder (AIRS) and the Microwave Limb Sounder (MLS) ozone algorithms based on retrieved daytime and night-time ozone
Source: Copernicus journal article supplement (doi:10.5194/amt-14-1673-2021), 2021-03-01
Supplement: Supplementary file 1 [file amt-14-1673-2021-supplement.pdf]

Supplement of Atmos. Meas. Tech., 14, 1673–1687, 2021  
<https://doi.org/10.5194/amt-14-1673-2021-supplement>  
© Author(s) 2021. This work is distributed under  
the Creative Commons Attribution 4.0 License.

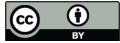

*Supplement of*

**Verification of the Atmospheric Infrared Sounder (AIRS) and the  
Microwave Limb Sounder (MLS) ozone algorithms based on  
retrieved daytime and night-time ozone**

**Wannan Wang et al.**

*Correspondence to:* Tianhai Cheng (chength@radi.ac.cn)

The copyright of individual parts of the supplement might differ from the CC BY 4.0 License.

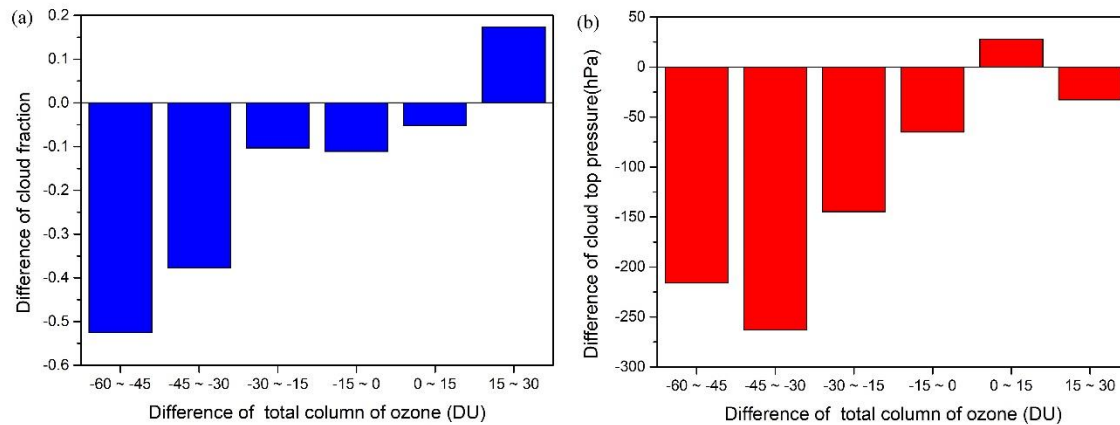

**Figure S1. (a) Average day/night difference of cloud fraction as function of difference of total column of ozone. (b) Average day/night difference of cloud top pressure as function of difference of total column of ozone. We select AIRS L2 daily observations over a part of Pacific Ocean near the South America [20 °S,100 °W,10 °S,90 °W] when there are persistent clouds day and night in 2018.**

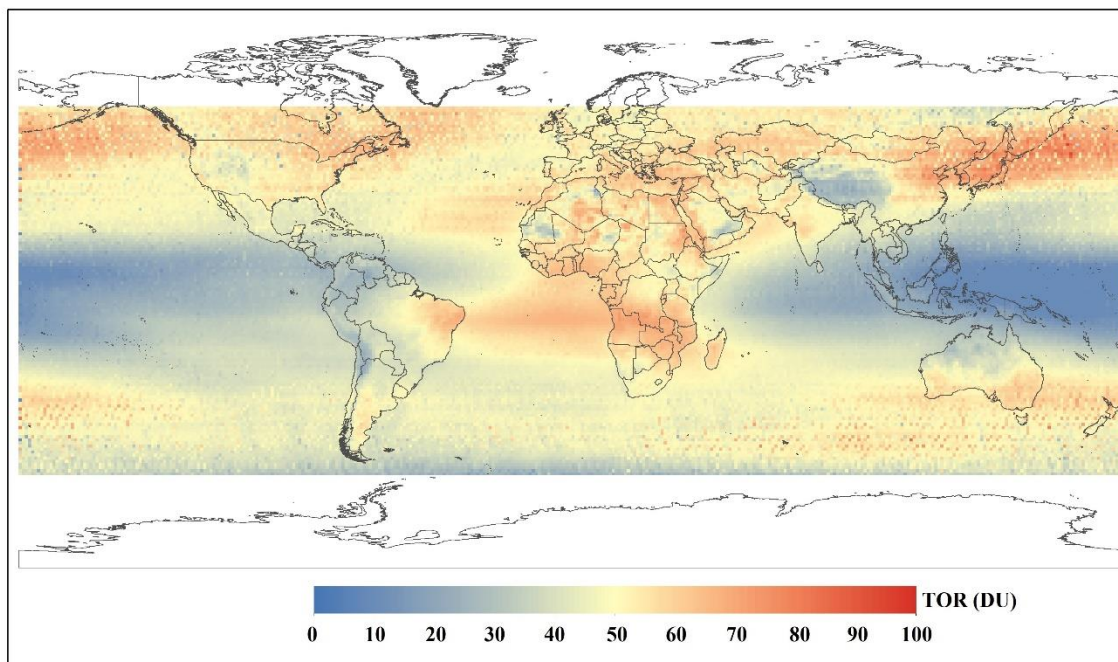

**Figure S2. Daytime tropospheric ozone residuals (TOR) averaged for 2005-2018 in 60°S-60°N. The TOR is calculated as AIRS TCO – MLS SCO.**

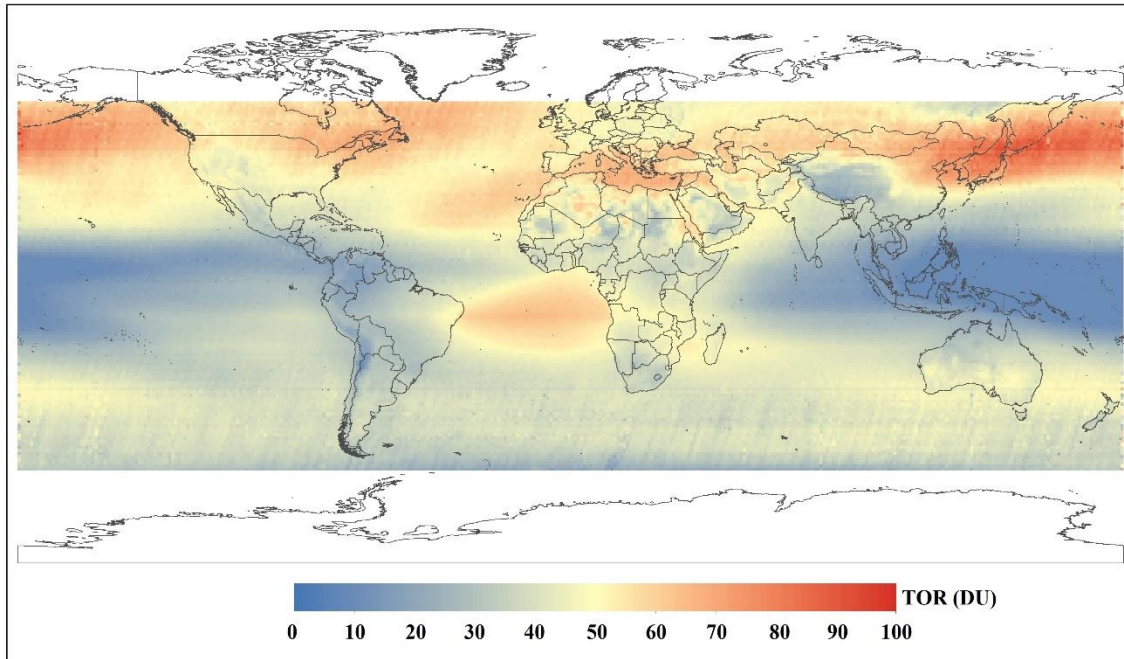

Figure S3. Same as Figure S2, but for nighttime.

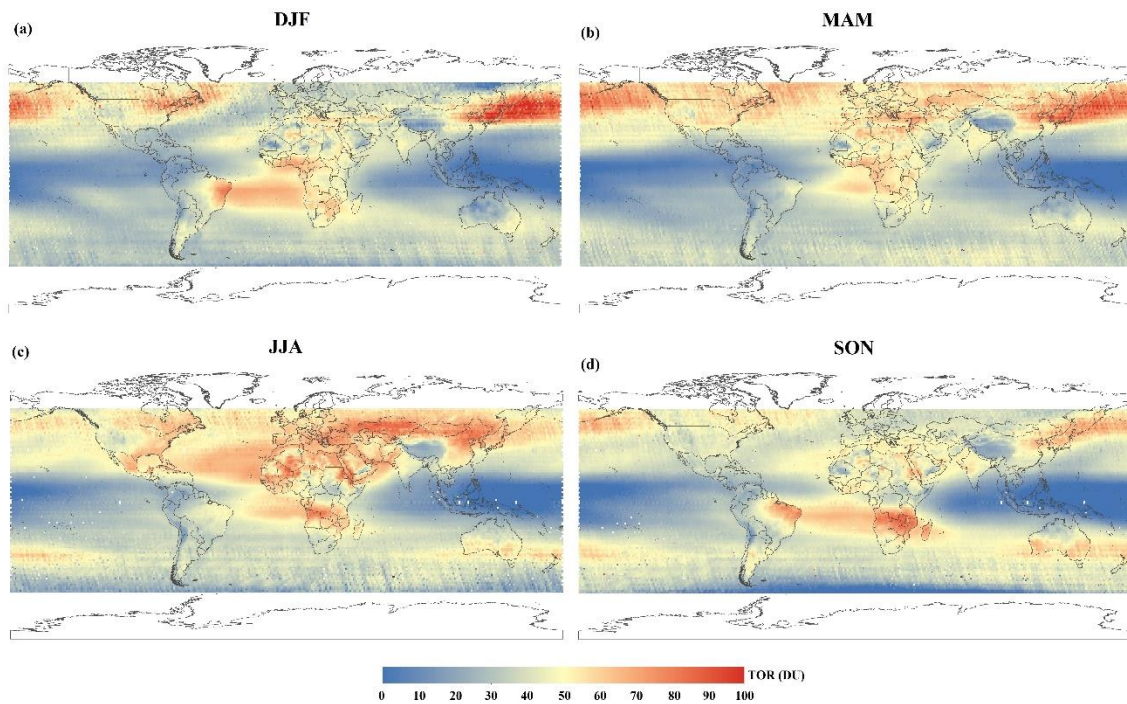

Figure S4. Seasonal daytime TOR averaged for 2005-2018 in 60°S-60°N. (a) DJF. (b) MAM. (c) JJA. (d) SON.

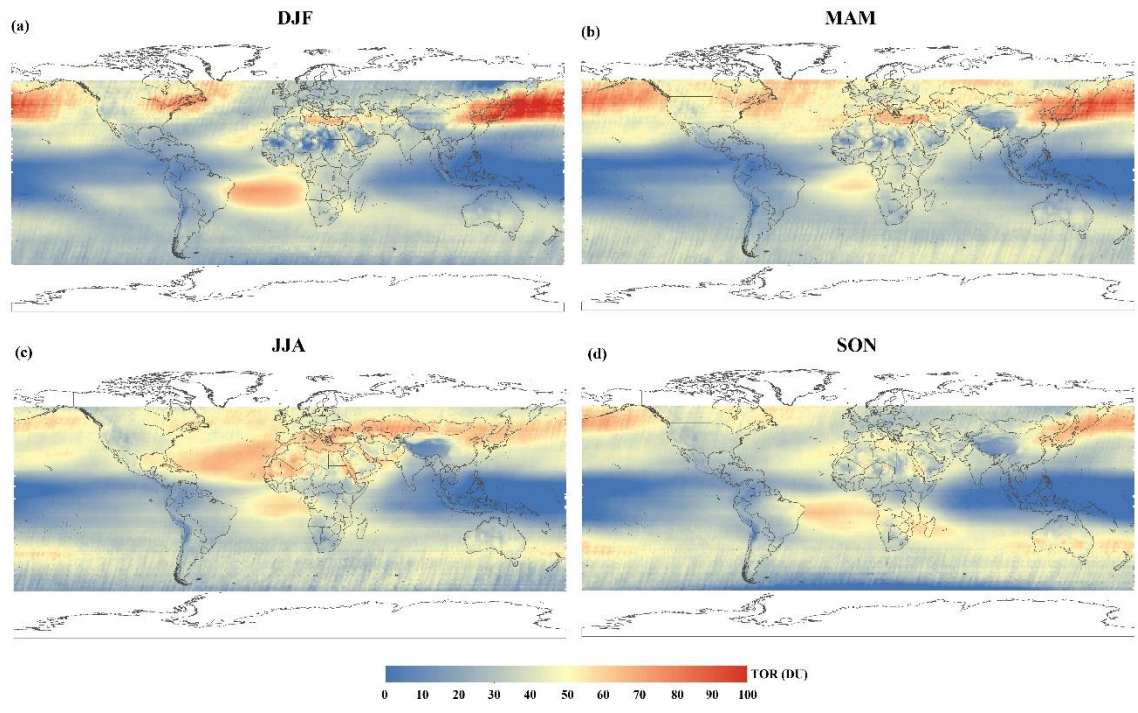

Figure S5. Same as Figure S4, but for nighttime.
